# Supplementary material for: The Global Preclinical Research and Development Landscape for Pre-Eclampsia and Eclampsia Therapies.
Source: Research Square preprint supplement (doi:10.21203/rs.3.rs-7361131/v1), 2025-10-31
Supplement: Supplementary file 1 [file 790ebd53d509e7570b29c69a.xlsx]

## Sheet: Raw Data
Supplementary Data 1: Excel spreadsheet with analysis (raw data)
																					PRODUCT DEVELOPMENT
				QUALITY																	TRL1 - basic scientific research	TRL2 - concept formulation	TRL3 - mechanism of action						TRL4 - toxicology and safety			TRL5 - Chemistry, Manufacturing and Control (CMC)		Absorption, distribution, metabolism and excretion (ADME)				IMPLEMENTABILITY					FINAL SCORE
Name	Archetype	Is the study excluded?	Is the drug candidate excluded?	Animal study or in vitro study?	1. Clearly stated aims/objectives	2. Detailed explanation of sample size calculation	3. Detailed explanation of sampling technique	4. Details of comparison group	5. Detailed explanation of methodology	6. Operator details	7. Randomisation	8. Method of measurement of outcome	9. Outcome assessor details	10. Blinding	11. Statistical analysis	12. Presentation of results	TOTAL PER STUDY	AVERAGE	NUMBER OF STUDIES	QUALITY SCORE	Have basic principles about the drug candidate been observed and reported?	Has a drug concept been formulated (development of hypothesis and experimental designs) and has a clear product profile been defined?	Has efficacy been demonstrated in an in vitro model for pre-eclampsia? (animal or human cells)	Has efficacy been demonstrated in an animal model for pre-eclampsia?	Is the mechanism of action for the drug candidate known?	Is there a proposed mechanism of action for how the drug candidate acts against pre-eclampsia?	Is the mechanism of action for how the drug candidate acts against pre-eclampsia evidenced in a pre-eclampsia model?	Does the drug candidate improve pre-eclampsia outcomes?	Has the drug demonstrated any safety concerns in pregnant and lactating women?	Has a safe allowable human dose been established for the drug candidate?	Was an equilavent safe human dosage used in the study?	Have formulation studies been performed for the drug candidate?	Is controlled production of the drug candidate performed under cGMP (current Good Manufacturing Practices)?	Has a half-life been established for the drug candidate?	Is the metabolic pathway of the drug candidate known?	Are any potential drug-drug interactions known?	PRODUCT DEVELOPMENT SCORE	Therapeutic indication	Route of administration	Storage conditions	Place of development	IMPLEMENTABILITY SCORE	FINAL SCORE	FINAL RANKING	TRL
Ad-VEGF (viral vector delivery) - PE/E	NCE		No															19	2	21	0	2	1	2	2	0	0	2	-1	0	0	0	0	0	0	0	8	4	1	-2	1	4	33	low	TRL3
https://pubmed.ncbi.nlm.nih.gov/10952892		No		Animal	2	0	0	2	0	0	0	2	0	0	2	4	12
https://pubmed.ncbi.nlm.nih.gov/21079047/		No		Both	0	2	4	4	4	0	0	4	0	2	2	4	26
AGT-targeting siRNA - PE/E	NCE		No															32	1	33	0	2	0	1	3	2	2	2	0	0	0	0	0	0	0	0	12	3	2	-2	1	4	49	medium	TRL3.5
https://pubmed.ncbi.nlm.nih.gov/32338644/		No		Animal	4	2	4	4	4	0	2	4	0	2	2	4	32
Amino acid - L-ergothioneine	Repurposed		No															30	1	31	1	2	0	2	2	0	0	2	1	2	1	1	1	1	1	0	17	4	4	-2	1	7	55	high	TRL3
https://pubmed.ncbi.nlm.nih.gov/31865793/		No		Animal	4	2	4	4	4	0	0	4	0	0	4	4	30
https://pubmed.ncbi.nlm.nih.gov/29284116/		Yes1
AP39	NCE		No															28	1	29	1	2	1	0	2	2	2	1	0	0	0	0	1	0	0	0	12	4	1	-2	1	4	45	medium	TRL3
https://www.ncbi.nlm.nih.gov/pmc/articles/PMC6854435/		No		In Vitro	4	2	4	2	4	0	0	4	0	0	4	4	28
Apolipoprotein A-I	NCE		No															33	2	35	1	1	1	1	3	2	2	1	0	0	0	0	0	1	0	0	13	1	1	-2	1	1	49	medium	TRL3.5
https://pubmed.ncbi.nlm.nih.gov/27806983/		No		Both	4	4	4	4	4	0	2	4	0	0	4	4	34
https://pubmed.ncbi.nlm.nih.gov/30237900/		No		Animal	4	2	4	4	4	0	2	4	0	0	4	4	32
Azathioprine	Repurposed		No															26	1	27	1	2	0	1	2	2	2	2	1	2	1	1	1	1	1	-2	18	3	4	2	1	10	55	high	TRL3.5
https://pubmed.ncbi.nlm.nih.gov/19617880/		No		Animal	2	2	4	2	4	0	0	4	2	0	2	4	26
BMS582949	NCE		No															20	1	21	1	2	1	0	2	2	0	0	0	0	0	0	0	0	0	0	8	3	4	-2	1	6	35	low	TRL3
https://pubmed.ncbi.nlm.nih.gov/29849826/		No		In Vitro	0	0	2	4	2	0	0	4	0	0	4	4	20
Carveol	NCE		No															26	1	27	0	2	1	0	3	2	0	0	0	0	0	0	0	1	1	0	10	3	0	0	1	4	41	medium	TRL3
https://pubmed.ncbi.nlm.nih.gov/32527034/		No		In Vitro	4	2	2	2	4	0	0	4	0	0	4	4	26
Celastrol	NCE		No															32	1	33	0	2	0	1	2	2	2	2	0	0	0	0	0	1	0	0	12	3	4	-2	1	6	51	medium	TRL3.5
https://pubmed.ncbi.nlm.nih.gov/29694830/		No		Animal	4	2	4	4	4	0	2	4	0	0	4	4	32
Cibinetide	NCE		No															26	1	27	1	2	0	1	2	2	2	2	0	1	1	0	0	0	0	0	14	3	2	-2	1	4	45	medium	TRL3.5
https://pubmed.ncbi.nlm.nih.gov/32942669/		No		Animal	2	2	4	2	4	0	0	4	0	0	4	4	26
CLR/RAMP agonists - PE/E	NCE		Yes1
https://pubmed.ncbi.nlm.nih.gov/23745703/		Yes1
https://reporter.nih.gov/project-details/8780971		Yes2
Cyclosporin A	Repurposed		No															34	1	35	1	2	0	1	3	0	0	2	1	2	1	1	1	1	1	-2	15	3	4	2	1	10	60	high	TRL3.5
https://www.nature.com/articles/s41440-019-0387-3		No		Animal	4	2	4	2	4	0	2	4	2	2	4	4	34
Dasatinib	Repurposed		Yes3
https://adisinsight.springer.com/drugs/800020592		Yes2
https://pubmed.ncbi.nlm.nih.gov/26348106/		Yes3
https://pubmed.ncbi.nlm.nih.gov/29284357/		Yes3
https://pubmed.ncbi.nlm.nih.gov/31521202/		No
Doramapimod	NCE		No															20	1	21	1	2	1	0	2	2	0	0	0	0	0	0	0	0	0	0	8	3	4	-2	1	6	35	low	TRL3
https://pubmed.ncbi.nlm.nih.gov/29849826/		No		In Vitro	0	0	2	4	2	0	0	4	0	0	4	4	20
Emiplacel	NCE		No															28	1	29	1	2	0	1	3	2	2	2	1	0	0	1	1	0	0	0	16	4	1	0	1	6	51	medium	TRL3.5
https://pubmed.ncbi.nlm.nih.gov/26685104/		No		Animal	2	2	4	4	4	0	0	4	0	2	2	4	28
Etanercept - PE/E	Repurposed		No															28	2	30	0	2	1	2	3	2	2	2	1	2	1	1	1	1	1	-2	20	3	2	-2	1	4	54	medium	TRL5
https://pubmed.ncbi.nlm.nih.gov/18981324/		No		Both	4	2	4	2	4	0	0	4	0	0	2	4	26
https://pubmed.ncbi.nlm.nih.gov/32646252/		No		Animal	4	2	4	2	4	0	2	4	0	0	4	4	30
Ferulic acid	Repurposed		No															30	2	32	0	2	0	2	3	2	2	1	0	0	0	1	1	1	1	-2	14	3	4	-2	1	6	52	medium	TRL3.5
https://pubmed.ncbi.nlm.nih.gov/28640960/		No		Animal	2	2	4	4	4	0	2	4	0	0	4	4	30
https://pubmed.ncbi.nlm.nih.gov/30183401/		No		Animal	4	2	4	4	4	0	0	4	0	0	4	4	30
Gefitinib	Repurposed		No															36	1	37	1	2	2	1	3	2	0	1	-1	2	1	1	1	1	1	-2	16	3	4	2	1	10	63	high	TRL3.5
https://pubmed.ncbi.nlm.nih.gov/30636550/		No		Both	4	4	2	4	4	0	2	4	0	4	4	4	36
Gelsolin	NCE		No															30	1	31	1	2	1	0	2	0	0	0	0	0	0	0	0	1	0	-1	6	4	1	-2	1	4	41	medium	TRL3
https://pubmed.ncbi.nlm.nih.gov/27939478/		No		In Vitro	4	2	4	4	4	0	0	4	0	0	4	4	30
GYY4137 - PE/E	NCE		No															31	2	33	0	2	2	2	2	2	2	2	0	0	0	1	0	0	0	0	15	3	1	-2	1	3	51	medium	TRL4
https://pubmed.ncbi.nlm.nih.gov/23704251/		No		Both	2	2	4	4	4	0	2	4	0	2	2	4	30
https://pubmed.ncbi.nlm.nih.gov/31363805/		No		Animal	4	2	4	4	4	0	2	4	0	0	4	4	32
Haemoglobin vesicles (nanoparticle delivery) - PE/E	NCE		No															26.6667	3	29.6667	0	2	0	2	3	2	2	2	0	1	1	1	0	1	1	-1	17	3	1	-2	1	3	49.6667	medium	TRL3.5
https://pubmed.ncbi.nlm.nih.gov/22935405/		No		Animal	4	2	2	4	4	0	0	4	0	0	2	4	26
https://pubmed.ncbi.nlm.nih.gov/26471339/		No		Animal	2	2	4	4	4	0	0	4	0	0	4	4	28
https://pubmed.ncbi.nlm.nih.gov/28758949/		No		Animal	2	2	4	4	4	0	0	4	0	0	2	4	26
Herb - Boiogito	Repurposed		No															24	1	25	1	2	0	1	1	0	0	2	0	0	0	1	1	0	0	-2	7	3	4	2	1	10	42	medium	TRL3
https://pubmed.ncbi.nlm.nih.gov/17353120/		No		Animal	2	2	4	4	4	0	0	4	0	0	2	2	24
Herb - Euterpe oleracea	Repurposed		No															23	2	25	0	1	0	2	2	2	0	1	0	0	0	1	0	1	0	-1	9	1	4	2	1	8	42	medium	TRL3
https://pubmed.ncbi.nlm.nih.gov/17049314/		No		Both	4	2	0	2	2	0	0	2	0	0	4	4	20
https://pubmed.ncbi.nlm.nih.gov/32306786		No		Animal	4	2	4	2	4	0	0	4	0	0	2	4	26
Herb - Thymus schimperi	NCE		No															28	2	30	0	1	0	1	1	0	0	1	-1	1	-2	1	0	0	0	0	3	1	4	-2	1	4	37	low	TRL3
https://maxwellsci.com/jp/mspabstract.php?jid=BJPT&doi=bjpt.7.2779		No		Animal	4	2	0	4	2	0	2	4	0	0	4	2	24
https://www.researchgate.net/publication/342492125_Effects_of_Aqueous_Leaf_Extract_of_Thymus_schimperion_Hematologic_Profiles_of_Animal_Models_of_Pre-eclampsia (link in pipeline is not the same as the actual study)		No		Animal	4	2	4	4	4	0	2	4	0	0	4	4	32
HTHQ	NCE		No															24	1	25	0	2	1	1	3	2	2	2	0	0	0	0	0	1	0	0	14	4	4	-2	1	7	46	medium	TRL3.5
https://pubmed.ncbi.nlm.nih.gov/33542786/		No		Both	2	2	4	2	4	0	0	4	0	0	2	4	24
Hydrogen rich saline	Repurposed		No															31	2	33	0	2	1	2	2	0	0	2	1	0	0	0	0	0	0	0	10	4	1	-2	1	4	47	medium	TRL3
https://pubmed.ncbi.nlm.nih.gov/21764125/		No		Animal	2	2	4	4	4	0	2	4	0	0	4	4	30
https://pubmed.ncbi.nlm.nih.gov/27789293/		No		Both	4	2	4	4	4	0	2	4	0	0	4	4	32
Kynurenine	NCE		Yes2
https://www.tommys.org/research/research-topics/pregnancy-complication-research/pre-eclampsia/kynurenine-potential-treatment-women-pre-eclampsia		Yes2
Liraglutide	Repurposed		No															30	1	31	0	2	0	1	3	2	2	2	-1	2	-2	1	1	1	1	-2	13	3	2	-2	1	4	48	medium	TRL3.5
https://faseb.onlinelibrary.wiley.com/doi/abs/10.1096/fasebj.2019.33.1_supplement.574.7		No		Animal	2	2	4	4	4	0	2	4	0	0	4	4	30
Lovastatin - PE/E	Repurposed		No															22	2	24	1	2	2	0	3	0	0	2	-1	2	1	1	1	1	1	-2	14	3	4	2	1	10	48	medium	TRL3.5
https://pubmed.ncbi.nlm.nih.gov/32818477		Yes1
https://pubmed.ncbi.nlm.nih.gov/9537338		No		In Vitro	4	2	0	2	4	0	2	4	0	0	2	4	24
https://www.isisn.org/BR15(2)2018/967-974-15(2)2018BR-18-73.pdf		No		In Vitro	2	2	4	2	2	0	0	2	0	0	2	4	20
https://pubmed.ncbi.nlm.nih.gov/34044205/		Yes1
Menadione	Repurposed		Yes3
https://pubmed.ncbi.nlm.nih.gov/30415746/		Yes3
MitoQ	Repurposed		Yes3
https://pubmed.ncbi.nlm.nih.gov/32228063/		Yes3
Moxonidine	Repurposed		No															28	1	29	1	1	0	2	3	2	2	1	-1	2	-2	1	1	1	1	-2	13	1	4	2	1	8	50	medium	TRL3.5
https://pubmed.ncbi.nlm.nih.gov/15071362		No		Animal	4	2	4	4	4	0	0	4	0	0	4	2	28
Mycophenolate mofetil	Repurposed		Yes3
https://pubmed.ncbi.nlm.nih.gov/19617880/		Yes3
MZe786 - PE/E	NCE		No															32	2	34	1	2	0	2	3	2	2	2	1	1	1	1	0	0	1	1	20	4	4	0	1	9	63	high	TRL5
https://pubmed.ncbi.nlm.nih.gov/33321463		No		Animal	4	2	4	4	4	0	0	4	0	2	2	4	30
https://pubmed.ncbi.nlm.nih.gov/33137710		No		Animal	4	2	4	4	4	0	2	4	0	2	4	4	34
Nicorandil - PE/E	Repurposed		Yes2
https://doi.org/10.17116/repro2015214129-133		Yes1
https://rrpharmacology.pensoft.net/article/35316/		Yes2
Ouabain - PE/E	Repurposed		No															30	1	31	0	2	2	2	3	2	2	2	-1	1	1	1	0	1	0	-2	16	4	1	0	1	6	53	medium	TRL3.5
https://pubmed.ncbi.nlm.nih.gov/24970393/		No		Both	4	2	4	4	4	0	0	4	0	0	4	4	30
https://www.ahajournals.org/doi/10.1161/HYPERTENSIONAHA.116.06599		Yes1
Pirmagrel	NCE		No															26	1	27	1	2	1	0	2	0	0	1	0	0	0	0	0	1	0	0	8	3	0	0	1	4	39	low	TRL3
https://pubmed.ncbi.nlm.nih.gov/6371062/		Yes1
https://pubmed.ncbi.nlm.nih.gov/12361679/		No		In Vitro	4	2	4	2	4	0	0	4	0	0	2	4	26
Placental growth factor	NCE		No															27.3333	3	30.3333	1	2	1	2	3	2	2	2	0	1	1	1	1	1	1	0	21	3	2	-2	1	4	55.3333	high	TRL3.5
https://pubmed.ncbi.nlm.nih.gov/26831193/		No		Animal	2	2	4	4	2	0	2	4	0	0	4	4	28
https://pubmed.ncbi.nlm.nih.gov/27091894/		No		Animal	2	2	4	4	2	0	0	4	0	0	4	4	26
https://pubmed.ncbi.nlm.nih.gov/32654553/		No		Animal	4	2	4	4	2	0	0	4	0	0	4	4	28
https://reporter.nih.gov/project-details/9732626		Yes2
https://pubmed.ncbi.nlm.nih.gov/25249978/		Yes1
https://reporter.nih.gov/project-details/9481296		Yes2
Polyphenol - Grape seed extract - PE/E	Repurposed		No															26	1	27	0	1	0	0	2	0	0	1	0	2	1	1	1	1	0	-2	8	1	4	2	1	8	43	medium	TRL3
https://pubmed.ncbi.nlm.nih.gov/25793191/		Yes1
https://pubmed.ncbi.nlm.nih.gov/27537554/		Yes1
https://pubmed.ncbi.nlm.nih.gov/33240108/		No		Animal	2	2	2	4	4	0	2	2	0	0	4	4	26
Polyphenol - Mangiferin	Repurposed		No															29	2	31	0	2	0	2	3	2	2	2	1	1	1	1	1	1	1	-1	19	4	4	-2	1	7	57	high	TRL5
https://pubmed.ncbi.nlm.nih.gov/29934052/		No		Both	4	2	0	4	4	0	2	4	0	0	4	4	28
https://pubmed.ncbi.nlm.nih.gov/31989480/		No		Animal	4	2	4	4	4	0	0	4	0	0	4	4	30
Polyphenol - Moringa oleifera	NCE		No															30	1	31	0	2	0	1	1	0	0	2	-1	1	1	1	0	1	1	-1	9	4	4	2	1	11	51	medium	TRL3
https://www.ncbi.nlm.nih.gov/pmc/articles/PMC6918402/		Yes1
http://dx.doi.org/10.7324/JAPS.2020.10806		No		Animal	4	2	4	2	4	0	2	4	0	0	4	4	30
Polyphenol - Quercetin	Repurposed		No															25.3333	3	28.3333	0	2	1	2	3	2	2	2	0	1	1	1	1	1	1	-2	18	4	4	-2	1	7	53.3333	medium	TRL3.5
https://pubmed.ncbi.nlm.nih.gov/31940027/		Yes1
https://pubmed.ncbi.nlm.nih.gov/31022396/		No		In Vitro	4	0	4	4	4	0	0	4	0	0	4	4	28
https://pubmed.ncbi.nlm.nih.gov/31103824/		No		Animal	2	2	2	4	4	0	0	2	0	0	4	4	24
https://pubmed.ncbi.nlm.nih.gov/32305698/		No		Animal	0	2	4	2	4	0	2	2	0	0	4	4	24
Polyphenol - Scutellaria baicalensis root extract (Baicalin)	Repurposed		No															29	2	31	0	1	1	1	3	0	0	1	0	1	-2	1	1	1	0	0	9	1	4	2	1	8	48	medium	TRL3
https://sciendo.com/article/10.2478/hepo-2019-0001		Yes2
https://pubmed.ncbi.nlm.nih.gov/30372856		No		Both	2	2	4	4	4	0	2	4	0	0	4	4	30
https://pubmed.ncbi.nlm.nih.gov/33081553		No		Animal	4	2	4	4	2	0	0	4	0	0	4	4	28
https://pubmed.ncbi.nlm.nih.gov/33435803		Yes2
https://pubmed.ncbi.nlm.nih.gov/34320906/		Yes2
Polyphenol - Uncaria rhynchophylla extract	Repurposed		No															25.3333	3	28.3333	0	2	0	1	3	0	0	2	0	0	0	1	0	0	0	0	9	3	4	2	1	10	47.3333	medium	TRL3
https://pubmed.ncbi.nlm.nih.gov/23376412		Yes1
https://pubmed.ncbi.nlm.nih.gov/26539222		No		Animal	4	2	0	4	4	0	2	4	0	0	4	4	28
https://pubmed.ncbi.nlm.nih.gov/20828308		No		In Vitro	2	0	0	2	4	0	0	4	0	0	2	4	18
https://pubmed.ncbi.nlm.nih.gov/31116257		No		Animal	4	2	4	4	4	0	2	2	0	0	4	4	30
Polyphenol - Vitexin			No															32	1	33	0	2	0	1	2	0	0	2	0	0	0	0	1	0	0	-1	7	1	4	-2	1	4	44	medium	TRL3
https://pubmed.ncbi.nlm.nih.gov/31486114		No		Animal	4	2	4	4	4	0	2	4	0	0	4	4	32
Polyphenol - Vitis labrusca/vinifera extract	Repurposed		No															22.6667	3	25.6667	0	1	0	1	2	0	0	1	-1	1	-2	1	1	0	0	-2	3	1	4	2	1	8	36.6667	low	TRL3
https://pubmed.ncbi.nlm.nih.gov/12495554		No		Animal	2	2	4	4	4	0	0	0	0	0	2	4	22
https://pubmed.ncbi.nlm.nih.gov/17454221		No		Animal	2	2	4	4	4	0	0	2	0	0	2	4	24
https://pubmed.ncbi.nlm.nih.gov/32292752/		No		Animal	2	2	0	4	4	0	0	2	0	0	4	4	22
Regulatory T cells	NCE		No															24	1	25	0	1	0	1	3	2	0	1	1	0	0	0	0	1	0	0	10	1	1	-2	1	1	36	low	TRL3
https://pubmed.ncbi.nlm.nih.gov/26290102/		No		Animal	4	2	4	2	2	0	0	4	0	0	2	4	24
Research programme - GPCR-AAB binding aptamers	NCE		Yes1
https://pubmed.ncbi.nlm.nih.gov/23144646/		Yes1
Research programme - Gynaecological disorder therapeutics	NCE		Yes2
https://adisinsight.springer.com/drugs/800058935		Yes2
Saireito	Repurposed		No															24	1	25	1	2	0	1	1	0	0	2	-1	2	-2	1	1	0	0	-2	6	3	4	2	1	10	41	medium	TRL3
https://pubmed.ncbi.nlm.nih.gov/17353120/		No		Animal	2	2	4	4	4	0	0	4	0	0	2	2	24
SB203580	NCE		No															24	2	26	0	2	2	2	3	2	2	1	0	0	0	0	0	0	0	0	14	3	1	-2	1	3	43	medium	TRL3.5
https://pubmed.ncbi.nlm.nih.gov/29849826/		No		In Vitro	0	0	2	4	2	0	0	4	0	0	4	4	20
https://pubmed.ncbi.nlm.nih.gov/31507429/		No		Both	0	2	4	4	4	0	2	4	0	0	4	4	28
sFlt-1-targeting siRNA (nanoparticle delivery)	NCE		No															27	2	29	0	2	1	1	3	2	2	2	1	0	0	1	0	0	0	-1	14	4	2	-2	1	5	48	medium	TRL4
https://pubmed.ncbi.nlm.nih.gov/28962687/		No		Both	2	2	4	4	4	0	2	4	0	0	4	4	30
https://pubmed.ncbi.nlm.nih.gov/32117942/		No		Both	4	2	2	2	2	0	0	4	0	0	4	4	24
Simvastatin - PE/E	Repurposed		Yes3
https://pubmed.ncbi.nlm.nih.gov/28529486/		Yes1
https://pubmed.ncbi.nlm.nih.gov/17389265/		No
https://pubmed.ncbi.nlm.nih.gov/27207105/		No
https://pubmed.ncbi.nlm.nih.gov/32199147/		Yes3
https://pubmed.ncbi.nlm.nih.gov/34044205/		Yes1
Sodium hydrosulfide - PE/E	NCE		No															29.3333	3	32.3333	0	2	1	2	2	2	2	2	-1	0	0	1	0	1	1	0	15	3	1	2	1	7	54.3333	medium	TRL3.5
https://pubmed.ncbi.nlm.nih.gov/24335973		No		Both	2	2	4	4	4	0	0	4	0	0	2	4	26
https://pubmed.ncbi.nlm.nih.gov/27620880/		No		Animal	2	2	4	4	4	0	2	4	0	0	4	4	30
https://pubmed.ncbi.nlm.nih.gov/31363805		No		Animal	4	2	4	4	4	0	2	4	0	0	4	4	32
Sofalcone	Repurposed		No															24	1	25	0	2	1	0	2	2	0	-1	0	0	0	1	0	1	0	-1	7	3	4	-2	1	6	38	low	TRL3
https://pubmed.ncbi.nlm.nih.gov/25667213/		No		In Vitro	4	2	2	2	2	0	0	4	0	0	4	4	24
SynB1-ELP-p50i (polypeptide delivery)	NCE		No															38	1	39	1	2	1	2	2	2	2	2	0	0	0	1	0	1	0	0	16	3	1	-2	1	3	58	high	TRL3
https://pubmed.ncbi.nlm.nih.gov/31786977/		No		Both	4	4	4	4	4	0	2	4	0	4	4	4	38
Tempol - PE/E	NCE		No															28	1	29	1	2	0	1	2	0	0	2	0	0	0	0	0	1	0	-1	8	3	1	0	1	5	42	medium	TRL3
https://pubmed.ncbi.nlm.nih.gov/18259014/		No		Animal	4	2	4	4	4	0	0	4	0	0	2	4	28
Tetramethylpyrazine	Repurposed		No															29	2	31	0	2	1	2	3	2	2	2	0	2	-2	1	1	1	0	-2	15	3	1	-2	1	3	49	medium	TRL4
https://pubmed.ncbi.nlm.nih.gov/30937928/		No		Animal	2	2	4	2	4	0	2	4	0	0	2	4	26
https://pubmed.ncbi.nlm.nih.gov/33112793		No		Both	4	2	4	4	4	0	2	4	0	0	4	4	32
http://www.chictr.org.cn/showproj.aspx?proj=4990		Yes2
https://pubmed.ncbi.nlm.nih.gov/27668034/		Yes1
Toki-shakuyaku-san - PE/E	Repurposed		No															25	2	27	1	1	0	1	2	2	0	1	0	2	-2	1	1	0	0	-1	9	1	4	2	1	8	44	medium	TRL3
https://pubmed.ncbi.nlm.nih.gov/14971720/		No		Animal	2	2	4	4	4	0	0	2	0	0	2	4	24
https://pubmed.ncbi.nlm.nih.gov/15997172/		No		Animal	2	2	4	4	4	0	0	4	0	0	2	4	26
Trehalose	Repurposed		Yes4
https://onlinelibrary.wiley.com/doi/abs/10.1111/aji.106_12984		Yes4
TRV027	NCE		No															25	2	27	0	2	1	1	3	2	2	2	0	1	1	0	1	1	0	0	17	4	1	-2	1	4	48	medium	TRL3.5
https://pubmed.ncbi.nlm.nih.gov/30503206/		No		Both	2	2	4	2	4	0	2	4	0	2	4	4	30
https://pubmed.ncbi.nlm.nih.gov/20801892/		No		Both	4	0	0	4	2	0	0	4	0	0	2	4	20
https://adisinsight.springer.com/trials/700261681		Yes2
https://www.clinicaltrialsarena.com/news/trevena-trv027-trial-covid-19/		Yes1
VEGF-121 - PE/E	NCE		No															32	1	33	0	2	0	1	3	2	2	1	-1	0	0	0	0	1	0	0	11	4	2	-2	1	5	49	medium	TRL3.5
https://pubmed.ncbi.nlm.nih.gov/17724276/		No		Animal	4	2	4	4	4	0	2	4	0	0	4	4	32
https://pubmed.ncbi.nlm.nih.gov/10952892		Yes1
https://pubmed.ncbi.nlm.nih.gov/27033458/		Yes1
VEGF-B (polypeptide delivery)	NCE		Yes3
https://reporter.nih.gov/project-details/9973513		Yes2
https://pubmed.ncbi.nlm.nih.gov/29629873/		Yes3
https://pubmed.ncbi.nlm.nih.gov/10952892		Yes1
VG 1177	NCE		No															24	1	25	1	2	0	1	3	2	2	2	0	0	0	0	0	0	0	0	13	4	1	-2	1	4	42	medium	TRL3.5
https://pubmed.ncbi.nlm.nih.gov/28642294/		No		Animal	2	2	4	4	4	0	0	4	0	0	2	2	24
YC 1	NCE		No															28	2	30	1	2	2	1	2	2	2	2	0	0	0	0	0	0	0	0	14	3	1	-2	1	3	47	medium	TRL3.5
https://pubmed.ncbi.nlm.nih.gov/24144050/		No		Animal	4	2	4	4	4	0	0	4	0	0	4	2	28
https://pubmed.ncbi.nlm.nih.gov/26159901/		No		In Vitro	2	2	4	4	4	0	0	4	0	0	4	4	28
