# Supplementary material for: The Global Preclinical Research and Development Landscape for Pre-Eclampsia and Eclampsia Therapies.
Source: Research Square preprint supplement (doi:10.21203/rs.3.rs-7361131/v1), 2025-10-31
Supplement: Supplementary file 1 [file dd6d47c2827d0e52c3fcf724.pdf]

## Supplementary Information

### Supplementary Table 1. Scoring for assessment of preclinical candidate medicines for pre-eclampsia.

**a) Quality of evidence for preclinical candidate medicines for pre-eclampsia.** Calculation of candidate quality of evidence is first calculated per study. For each variable, the study is assigned a coding value. These coding values are then added together to obtain the overall quality of evidence for that study (max total coding value of 48 per study). For candidates with multiple studies, the average score among all associated studies will then be calculated. Once this score has been determined, the final coding value (regarding number of studies per candidate) can be added to this average score. This creates the final quality of evidence score given to the preclinical drug candidates' (max total coding value of 53 per candidate).

| Variable                                        | Answer options      | Answer criteria                                                                                     | Coding value |
|-------------------------------------------------|---------------------|-----------------------------------------------------------------------------------------------------|--------------|
| Clearly stated aims/objectives                  | Adequately scored   | Well defined and specific aims and objectives to the study.                                         | 4            |
|                                                 | Inadequately scored | Hypothesis stated but no set aim mentioned beyond testing the drug (vague aims).                    | 2            |
|                                                 | Not specified       | No aims, hypothesis and/or objectives mentioned.                                                    | 0            |
| Detailed explanation of sample size calculation | Adequately scored   | Well defined sample size calculation: all calculations and components reported; sample size stated. | 4            |
|                                                 | Inadequately scored | Sample size stated, but no calculation present.                                                     | 2            |
|                                                 | Not specified       | No mention of sample size or calculation.                                                           | 0            |
|                                                 | Adequately scored   | <i>For animal model:</i>                                                                            | 4            |

|                                            |                     |                                                                                                                                                                                                                                                                                                    |   |
|--------------------------------------------|---------------------|----------------------------------------------------------------------------------------------------------------------------------------------------------------------------------------------------------------------------------------------------------------------------------------------------|---|
| Detailed explanation of sampling technique |                     | Pre-eclampsia animal model used.<br><i>For in vitro model:</i><br>Pre-eclampsia <i>in vitro</i> model used; cells taken from primary human tissue either from a patient with pre-eclampsia or cells are from a normal pregnancy and then placed under pre-eclampsia-like conditions (eg: hypoxia). |   |
|                                            | Inadequately scored | <i>For animal model:</i><br>Pregnant animal model used.<br><i>For in vitro model:</i><br>Cells taken from primary human tissue from a patient with normal pregnancy.                                                                                                                               | 2 |
|                                            | Not specified       | No information on population; non-pregnant model used.                                                                                                                                                                                                                                             | 0 |
| Details of comparison group                | Adequately scored   | Vehicle control group mentioned, and details provided.                                                                                                                                                                                                                                             | 4 |
|                                            | Inadequately scored | Mention of comparison group with insufficient detail.                                                                                                                                                                                                                                              | 2 |
|                                            | Not specified       | No mention of comparison group.                                                                                                                                                                                                                                                                    | 0 |
| Detailed explanation of methodology        | Adequately scored   | Easy to comprehend procedure, explanation of novel terms and techniques.                                                                                                                                                                                                                           | 4 |
|                                            | Inadequately scored | Somewhat vague procedure but can be followed appropriately or detailed but hard to follow, no missing information.                                                                                                                                                                                 | 2 |
|                                            | Not specified       | Confusing/vague procedures, novel terms/techniques not expanded upon, missing information/procedures.                                                                                                                                                                                              | 0 |

|                               |                     |                                                                                                                                |   |
|-------------------------------|---------------------|--------------------------------------------------------------------------------------------------------------------------------|---|
| Operator details              | Adequately scored   | Number of operators and training details identified.                                                                           | 4 |
|                               | Inadequately scored | Number of operators or training details identified – one of the two.                                                           | 2 |
|                               | Not specified       | Neither identified.                                                                                                            | 0 |
| Randomisation                 | Adequately scored   | Sequence generation and allocation concealment reported.                                                                       | 4 |
|                               | Inadequately scored | Randomisation mentioned but not elaborated.                                                                                    | 2 |
|                               | Not specified       | No mention of randomisation.                                                                                                   | 0 |
| Method of outcome measurement | Adequately scored   | Measurement of outcome/experiment performed has a clear rationale.                                                             | 4 |
|                               | Inadequately scored | Measurement of outcome/experiment performed is mentioned but has a vague/no rationale.                                         | 2 |
|                               | Not specified       | Measurement of outcome is not mentioned.                                                                                       | 0 |
| Outcome assessor details      | Adequately scored   | Number of assessors and training details identified.                                                                           | 4 |
|                               | Inadequately scored | Number of assessors or training details identified – one of the two.                                                           | 2 |
|                               | Not specified       | Neither identified.                                                                                                            | 0 |
| Blinding                      | Adequately scored   | Blinding of operator, assessor and statistician maintained throughout study clearly specified and maintained throughout study. | 4 |
|                               | Inadequately scored | Blinding is mentioned but not elaborated.                                                                                      | 2 |
|                               | Not specified       | No mention of blinding.                                                                                                        | 0 |
| Statistical analysis          | Adequately scored   | Correct statistical analysis is performed and software package is mentioned.                                                   | 4 |

|                                                                                                                                     |                     |                                                                                                                    |   |
|-------------------------------------------------------------------------------------------------------------------------------------|---------------------|--------------------------------------------------------------------------------------------------------------------|---|
|                                                                                                                                     | Inadequately scored | Correct statistical analysis is performed but no mention of software package.                                      | 2 |
|                                                                                                                                     | Not specified       | No mention of statistical analysis or software package; wrong statistical analysis used.                           | 0 |
| Presentation of results                                                                                                             | Adequately scored   | Results/data from all experiments have been presented in a clear and concise manner either visually or in writing. | 4 |
|                                                                                                                                     | Inadequately scored | Results/data from all experiments have been reported in a somewhat vague or overly complicated manner.             | 2 |
|                                                                                                                                     | Not specified       | No mention of results or some results/data from experiments performed is missing.                                  | 0 |
| <b><i>Calculate average score from all associated studies for that drug candidate, then add coding value for next question.</i></b> |                     |                                                                                                                    |   |
| Number of studies per candidate                                                                                                     | Five                | Five studies performed on drug candidate.                                                                          | 5 |
|                                                                                                                                     | Four                | Four studies performed on drug candidate.                                                                          | 4 |
|                                                                                                                                     | Three               | Three studies performed on drug candidate.                                                                         | 3 |
|                                                                                                                                     | Two                 | Two studies performed on drug candidate.                                                                           | 2 |
|                                                                                                                                     | One                 | One study performed on drug candidate.                                                                             | 1 |

**b) Product development for preclinical candidate medicines for pre-eclampsia.**

Calculation of candidate product development is calculated per candidate. For each variable, the candidate is assigned a coding value. These coding values are then added together to obtain the overall candidate product development (max total coding value of 26).

| Variable                                                                                                                              | Answer options | Answer criteria                                                                                     | Coding value |
|---------------------------------------------------------------------------------------------------------------------------------------|----------------|-----------------------------------------------------------------------------------------------------|--------------|
| <b><i>TRL1 – basic scientific research</i></b>                                                                                        |                |                                                                                                     |              |
| Have basic principles about the drug candidate been observed and reported?                                                            | Yes            | Basic principles observed, published competitive landscape and market analysis report.              | 2            |
|                                                                                                                                       | Probably yes   | Basic principles observed, drug being developed by pharma company.                                  | 1            |
|                                                                                                                                       | Probably no    | Basic principles observed but no competitive landscape and market analysis report.                  | 0            |
|                                                                                                                                       | No             | No basic principles observed.                                                                       | -1           |
|                                                                                                                                       | Unsure         | Unknown or basic principles observed, and drug is being developed by an academic institute.         | 0            |
| <b><i>TRL2 – concept formulation</i></b>                                                                                              |                |                                                                                                     |              |
| Has a drug concept been formulated (development of hypothesis and experimental designs) and has a clear product profile been defined? | Yes            | Drug concept formulated and product profile defined for a prevention or treatment of pre-eclampsia. | 2            |
|                                                                                                                                       | To an extent   | Drug concept formulated and product profile defined for a symptom management of pre-eclampsia.      | 1            |
|                                                                                                                                       | No             | No drug concept formulated, and no product profile defined.                                         | -1           |
|                                                                                                                                       | Unsure         | Unknown.                                                                                            | 0            |
| <b><i>TRL3 – mechanism of action</i></b>                                                                                              |                |                                                                                                     |              |
| Has efficacy been demonstrated in an                                                                                                  | Yes            | Strong evidence provided by the <i>in vitro</i> studies performed, demonstrate that the drug can be | 2            |

|                                                                      |              |                                                                                                                                                                                   |    |
|----------------------------------------------------------------------|--------------|-----------------------------------------------------------------------------------------------------------------------------------------------------------------------------------|----|
| <i>in vitro</i> model for pre-eclampsia?                             |              | used to prevent/treat pre-eclampsia.                                                                                                                                              |    |
|                                                                      | To an extent | <i>In vitro</i> studies have provided some evidence that the drug works to prevent/treat pre-eclampsia, but they mention that future studies are needed to confirm this evidence. | 1  |
|                                                                      | No           | No evidence of efficacy in an <i>in vitro</i> model.                                                                                                                              | 0  |
|                                                                      | Unsure       | Unknown.                                                                                                                                                                          | 0  |
| Has efficacy been demonstrated in an animal model for pre-eclampsia? | Yes          | Strong evidence provided by the animal studies performed, demonstrate that the drug can be used to prevent/treat pre-eclampsia.                                                   | 2  |
|                                                                      | To an extent | Animal studies have provided some evidence that the drug works to prevent/treat pre-eclampsia, but they mention that future studies are needed to confirm this evidence.          | 1  |
|                                                                      | No           | No evidence of efficacy in an animal model.                                                                                                                                       | 0  |
|                                                                      | Unsure       | Unknown.                                                                                                                                                                          | 0  |
| Is the mechanism of action for the drug candidate known?             | Yes          | Repurposed drug. All of the following is known: target, pathway, or end-result/indication.                                                                                        | 3  |
|                                                                      | Probably yes | Two of the following is known: target, pathway, or end-result/indication.                                                                                                         | 2  |
|                                                                      | Probably no  | One of the following is known: target, pathway, or end-result/indication.                                                                                                         | 1  |
|                                                                      | No           | Mechanism of action has not yet been discovered.                                                                                                                                  | -1 |
|                                                                      | Unsure       | Unknown.                                                                                                                                                                          | 0  |
| Is there a proposed mechanism of action for how the drug             | Yes          | Drug is suspected to work via “this mechanism of action” against pre-eclampsia.                                                                                                   | 2  |

|                                                                                                                      |              |                                                                                                                                                                                                                                                   |    |
|----------------------------------------------------------------------------------------------------------------------|--------------|---------------------------------------------------------------------------------------------------------------------------------------------------------------------------------------------------------------------------------------------------|----|
| candidate acts against pre-eclampsia?                                                                                | No           | Drug seems to work against pre-eclampsia however it is unknown how it does so.                                                                                                                                                                    | 0  |
|                                                                                                                      | Unsure       | Unknown                                                                                                                                                                                                                                           | 0  |
| Is the mechanism of action for how the drug candidate acts against pre-eclampsia evidenced in a pre-eclampsia model? | Yes          | Drug works via “this mechanism of action” as evidenced in a pre-eclampsia model.                                                                                                                                                                  | 2  |
|                                                                                                                      | No           | Suspected mechanism of action has not been evidenced in a pre-eclampsia model.                                                                                                                                                                    | 0  |
|                                                                                                                      | Unsure       | Unknown.                                                                                                                                                                                                                                          | 0  |
| Does the drug candidate improve pre-eclampsia outcomes?                                                              | Yes          | Drug candidate has been shown to improve pre-eclampsia outcomes in an animal pre-eclampsia model.                                                                                                                                                 | 2  |
|                                                                                                                      | To an extent | Drug candidate has been shown to improve pre-eclampsia outcomes in an <i>in vitro</i> pre-eclampsia model OR it only improves pre-eclampsia outcomes as symptom management OR drug has not been tested for fetal outcomes only maternal outcomes. | 1  |
|                                                                                                                      | No           | Either: 1- drug candidate has not shown improvements to pre-eclampsia outcomes in pre-eclampsia models OR<br>2. pre-eclampsia outcomes were not assessed in a pre-eclampsia model.                                                                | -1 |
|                                                                                                                      | Unsure       | Unknown.                                                                                                                                                                                                                                          | 0  |
| <b>TRL4 – toxicology and safety</b>                                                                                  |              |                                                                                                                                                                                                                                                   |    |
| Has the drug demonstrated any safety concerns in pregnant and lactating women?                                       | Yes          | Safety concerns have been raised in a clinical safety trial or in a large retrospective cohort study in pregnant or lactating women.                                                                                                              | -2 |
|                                                                                                                      | To an extent | Safety concerns have been raised in one or two small retrospective cohort studies in pregnant or lactating women OR safety                                                                                                                        | -1 |

|                                                                                                                          |              |                                                                                                                           |    |
|--------------------------------------------------------------------------------------------------------------------------|--------------|---------------------------------------------------------------------------------------------------------------------------|----|
|                                                                                                                          |              | concerns have been raised in preclinical studies.                                                                         |    |
|                                                                                                                          | No           | No safety concerns in pregnant or lactating women.                                                                        | 1  |
|                                                                                                                          | Unsure       | Unknown.                                                                                                                  | 0  |
| Has a safe allowable human dose been established for the drug candidate?                                                 | Yes          | Repurposed drug: safe dosage for humans has been approved for drug by FDA.                                                | 2  |
|                                                                                                                          | To an extent | A safe dose for humans has been approved for novel candidates.                                                            | 1  |
|                                                                                                                          | No           | No safe human dose had been established for this candidate.                                                               | 0  |
|                                                                                                                          | Unsure       | Unknown.                                                                                                                  | 0  |
| Was an equivalent safe human dosage used in the study?                                                                   | Yes          | An acceptable safe human dosage was used in the studies.                                                                  | 1  |
|                                                                                                                          | No           | A safe human dosage was not used in the studies; dosage was higher than safe allowable dose used to demonstrate efficacy. | -2 |
|                                                                                                                          | Unsure       | Either unknown or safe allowable human dose has not been established.                                                     | 0  |
| <b>TRL5 – Chemistry, Manufacturing and Control (CMC) &amp; Absorption, Distribution, Metabolism and Excretion (ADME)</b> |              |                                                                                                                           |    |
| Have formulation studies been performed for the drug candidate?                                                          | Yes          | Repurposed drug. Novel candidates have mentioned that formulation studies have been published.                            | 1  |
|                                                                                                                          | No           | Explicit mention that no formulation studies have been performed.                                                         | 0  |
|                                                                                                                          | Unsure       | Unknown if formulation studies have been performed/no mention of formulation studies.                                     | 0  |
| Is controlled production of the drug candidate performed under cGMP (current Good                                        | Yes          | Repurposed drug. Evidence needed for novel candidates to ensure that the candidate is manufactured under cGMP.            | 1  |
|                                                                                                                          | No           | Not manufactured under cGMP.                                                                                              | 0  |
|                                                                                                                          | Unsure       | Unknown.                                                                                                                  | 0  |



|                                                          |              |                                                   |    |
|----------------------------------------------------------|--------------|---------------------------------------------------|----|
| Manufacturing Practices)?                                |              |                                                   |    |
| Has a half-life been established for the drug candidate? | Yes          | Half-life established.                            | 1  |
|                                                          | No           | Half-life not established.                        | 0  |
|                                                          | Unsure       | Unknown.                                          | 0  |
| Is the metabolic pathway of the drug candidate known?    | Yes          | Metabolic pathway known.                          | 1  |
|                                                          | No           | No research into metabolic pathway of the drug.   | 0  |
|                                                          | Unsure       | Unknown.                                          | 0  |
| Are any potential drug-drug interactions known?          | Yes          | Proven interaction interactions with other drugs. | -2 |
|                                                          | To an extent | Potential/unproven interaction with another drug. | -1 |
|                                                          | No           | No interactions with other drugs.                 | 1  |
|                                                          | Unsure       | Unknown.                                          | 0  |

**c) Implementability for preclinical candidate medicines for pre-eclampsia.** Calculation of candidate implementability is calculated per candidate. For each variable, the candidate is assigned a coding value. These coding values are then added together to obtain the overall implementability (max total coding value of 11).

| Variable                                     | Answer options               | Answer criteria                                                          | Coding value |
|----------------------------------------------|------------------------------|--------------------------------------------------------------------------|--------------|
| Therapeutic indication                       | Prevent underlying aetiology | N/A                                                                      | 4            |
|                                              | Treat underlying aetiology   | N/A                                                                      | 3            |
|                                              | Prevent and treat            | N/A                                                                      | 4            |
|                                              | Symptom management           | N/A                                                                      | 1            |
|                                              | Unsure                       | Unknown.                                                                 | 0            |
| Route of administration                      | Intraarterial                | N/A                                                                      | 1            |
|                                              | Intravenous                  | N/A                                                                      | 1            |
|                                              | Subcutaneous                 | N/A                                                                      | 2            |
|                                              | Oral                         | N/A                                                                      | 4            |
|                                              | Intraperitoneal              | N/A                                                                      | 1            |
|                                              | Intramuscular                | N/A                                                                      | 2            |
|                                              | Unspecified                  | Unknown.                                                                 | 0            |
| Storage conditions – is cold chain required? | Yes                          | Storage/transport of drug within the range of +2°C to +8°C (cold chain). | -2           |
|                                              | No                           | Cold chain not required.                                                 | 2            |
|                                              | Unsure                       | Unknown.                                                                 | 0            |
| Place of development                         | Academic institute           | N/A                                                                      | 1            |
|                                              | Private company              | N/A                                                                      | 1            |
|                                              | Both                         | N/A                                                                      | 1            |
|                                              | Unsure                       | Unknown.                                                                 | 0            |

**d) Threshold for ranking of potential for preclinical candidate medicines for pre-eclampsia.** The summation of all coding values from the three domains are used to determine the final ranking of potential for each candidate. Quality of evidence accounts for 58.89% (max total coding value of 53), product development accounts for 28.89% (max total coding value of 26), and implementability accounts for 12.22% (max total coding value of 11) of the final score given to the preclinical candidates assessed. The maximum score a candidate can achieve is 90. The cut-off points as shown below were sense checked with experts in the field. The cut-off points and associated rankings allow candidates that are considered high potential by the systematic assessment to be scored as high.

| <b>Final ranking</b>    | <b>Preclinical cut-off points</b> |
|-------------------------|-----------------------------------|
| <i>High potential</i>   | >55                               |
| <i>Medium potential</i> | 41-54                             |
| <i>Low potential</i>    | <40                               |

## **Supplementary Data 1. Excel spreadsheet with analysis (raw data)**

## **Supplementary Table 2. Explanation for excluded candidates**

| <b>Candidate</b>                     | <b>Reason for Exclusion</b>                                                                      |
|--------------------------------------|--------------------------------------------------------------------------------------------------|
| CLR/RAMP agonists                    | Theoretical/hypothesised drug candidate.                                                         |
| Dasatinib                            | Studies report adverse effects of the drug candidate.                                            |
| Kynurenine                           | Data not publicly available; private company researching under commercial intellectual property. |
| Menadione                            | Studies report adverse effects of the drug candidate.                                            |
| MitoQ                                | Studies report adverse effects of the drug candidate.                                            |
| Mycophenolate mofetil                | Studies report adverse effects of the drug candidate.                                            |
| Nicorandil                           | Data not publicly available; private company researching under commercial intellectual property. |
| GPCR-AAB binding aptamers            | Theoretical/hypothesised drug candidate.                                                         |
| Gynaecological disorder therapeutics | Data not publicly available; private company researching under commercial intellectual property. |
| Simvastatin                          | Studies report adverse effects of the drug candidate.                                            |
| Trehalose                            | Study was not a full, published preclinical study; abstract only.                                |
| VEGF-B                               | Studies report adverse effects of the drug candidate.                                            |

**Supplementary Table 3. Extended summary of preclinical candidate medicines for pre-eclampsia/eclampsia.**

|    | Drug Candidate                          | Drug subclass            | Development status | Product type        | Archetype  | Target                            | Investigator            | Stage of Pre-eclampsia | Therapeutic indication | Technology Readiness Level (TRL) |
|----|-----------------------------------------|--------------------------|--------------------|---------------------|------------|-----------------------------------|-------------------------|------------------------|------------------------|----------------------------------|
| 1  | MZe786 <sup>1,2</sup>                   | Hydrogen sulphide donors | Active             | Drugs               | Novel      | HO1/Hmox1 promoter                | Pharmaceutical          | Undefined              | Prevention             | TRL 5                            |
| 2  | Gefitinib <sup>3</sup>                  | Small molecule           | Active             | Drugs               | Repurposed | EGFR inhibitor                    | Academic                | Early onset            | Treatment              | TRL 3.5                          |
| 3  | Cyclosporin A <sup>4</sup>              | Small molecule           | Active             | Drugs               | Repurposed | Calcineurin                       | Academic                | Undefined              | Treatment              | TRL 3.5                          |
| 4  | SynB1-ELP-p50i <sup>5</sup>             | Amino acid-peptide       | Active             | Biologics           | Novel      | NF-κB                             | Pharmaceutical/Academic | Undefined              | Treatment              | TRL 3                            |
| 5  | Mangiferin <sup>6,7</sup>               | Polyphenol               | Active             | Dietary supplements | Repurposed | Nrf-2                             | Academic                | Undefined              | Prevention/Treatment   | TRL 5                            |
| 6  | Placental growth factor <sup>8-10</sup> | Amino acid-peptide       | Active             | Biologics           | Novel      | sFlt-1                            | Pharmaceutical/Academic | Early and late onset   | Treatment              | TRL 3.5                          |
| 7  | L-ergothioneine <sup>11</sup>           | Amino acid-peptide       | Active             | Dietary supplements | Repurposed | Multiple (i.e. OCTN1 transporter) | Academic                | Undefined              | Prevention/Treatment   | TRL 3                            |
| 8  | Azathioprine <sup>12</sup>              | Small molecule           | Inactive           | Drugs               | Repurposed | Multiple (i.e. HPRT/TPMT enzymes) | Academic                | Undefined              | Treatment              | TRL 3.5                          |
| 9  | Sodium hydrosulfide <sup>13-15</sup>    | Hydrogen sulphide donors | Inactive           | Drugs               | Novel      | Unknown                           | Academic                | Undefined              | Treatment              | TRL 3.5                          |
| 10 | Etanercept <sup>16,17</sup>             | Amino acid-peptide       | Active             | Biologics           | Repurposed | TNF-α                             | Academic                | Undefined              | Treatment              | TRL 5                            |
| 11 | Quercetin <sup>18-20</sup>              | Polyphenol               | Active             | Dietary supplements | Repurposed | Multiple (i.e. MMP-1 and STK4)    | Academic                | Undefined              | Prevention/Treatment   | TRL 3.5                          |
| 12 | Ouabain <sup>21</sup>                   | Small molecule           | Inactive           | Drugs               | Repurposed | HIF-1α                            | Academic                | Undefined              | Prevention             | TRL 3.5                          |
| 13 | Ferulic acid <sup>22,23</sup>           | Antioxidant              | Active             | Dietary supplements | Repurposed | sFlt-1                            | Academic                | Undefined              | Treatment              | TRL 3.5                          |
| 14 | Celastrol <sup>24</sup>                 | Small molecule           | Inactive           | Drugs               | Novel      | MMP-9                             | Academic                | Undefined              | Treatment              | TRL 3.5                          |

|    |                                                                  |                             |          |                     |            |                                                       |                         |                      |                      |         |
|----|------------------------------------------------------------------|-----------------------------|----------|---------------------|------------|-------------------------------------------------------|-------------------------|----------------------|----------------------|---------|
| 15 | Emiplacel <sup>25</sup>                                          | Cell therapy                | Active   | Biologics           | Novel      | Unknown                                               | Pharmaceutical          | Undefined            | Prevention/Treatment | TRL 3.5 |
| 16 | Moringa oleifera <sup>26</sup>                                   | Polyphenol                  | Active   | Dietary supplements | Novel      | IL-17                                                 | Academic                | Undefined            | Prevention           | TRL 3   |
| 17 | GY4137 <sup>15,27</sup>                                          | Hydrogen sulphide donors    | Active   | Drugs               | Novel      | Heme oxygenase-1                                      | Academic                | Undefined            | Treatment            | TRL 4   |
| 18 | Moxonidine <sup>28</sup>                                         | Small molecule              | Inactive | Drugs               | Repurposed | Imidazoline I1 receptors                              | Academic                | Undefined            | Symptom management   | TRL 3.5 |
| 19 | Haemoglobin vesicles <sup>29-31</sup>                            | Cell therapy                | Inactive | Biologics           | Novel      | sFlt-1                                                | Academic                | Undefined            | Treatment            | TRL 3.5 |
| 20 | Apolipoprotein A-I <sup>32,33</sup>                              | Amino acid-peptide          | Inactive | Biologics           | Novel      | ATP binding cassette transporter A1                   | Pharmaceutical/Academic | Undefined            | Symptom management   | TRL 3.5 |
| 21 | Tetramethylpyrazine <sup>34,35</sup>                             | Vascular agents             | Active   | Drugs               | Repurposed | CHOP and GRP78                                        | Academic                | Undefined            | Treatment            | TRL 4   |
| 22 | VEGF-121 <sup>36</sup>                                           | DNA, siRNA, mRNA            | Inactive | Biologics           | Novel      | sFlt-1                                                | Academic                | Undefined            | Prevention/Treatment | TRL 3.5 |
| 23 | AGT-targeting siRNA <sup>37</sup>                                | DNA, siRNA, mRNA            | Active   | Biologics           | Novel      | Angiotensinogen                                       | Pharmaceutical          | Early and late onset | Treatment            | TRL 3.5 |
| 24 | Liraglutide <sup>38</sup>                                        | Amino-acid peptide          | Active   | Drugs               | Repurposed | GLP-1 receptor                                        | Academic                | Undefined            | Treatment            | TRL 3.5 |
| 25 | Lovastatin <sup>39,40</sup>                                      | Enzyme inhibitors (statins) | Inactive | Drugs               | Repurposed | HMG-CoA reductase                                     | Academic                | Undefined            | Treatment            | TRL 3.5 |
| 26 | Scutellaria baicalensis root extract (Baicalin) <sup>41,42</sup> | Polyphenol                  | Active   | Dietary supplements | Repurposed | Multiple (i.e. Annexin A2)                            | Academic                | Undefined            | Symptom management   | TRL 3   |
| 27 | sFlt-1-targeting siRNA <sup>43,44</sup>                          | DNA, siRNA, mRNA            | Active   | Biologics           | Novel      | sFlt-1                                                | Academic                | Undefined            | Prevention/Treatment | TRL 4   |
| 28 | TRV027 <sup>45,46</sup>                                          | Small molecule              | Active   | Drugs               | Novel      | Vascular AT1-B2 heterodimer receptor                  | Academic                | Late onset           | Prevention           | TRL 3.5 |
| 29 | Uncaria rhynchophylla extract <sup>47-49</sup>                   | Polyphenol                  | Active   | Dietary supplements | Repurposed | COX2                                                  | Academic                | Undefined            | Treatment            | TRL 3   |
| 30 | Hydrogen rich saline <sup>50,51</sup>                            | Antioxidant                 | Inactive | Drugs               | Repurposed | sFlt-1                                                | Academic                | Undefined            | Prevention/Treatment | TRL 3   |
| 31 | YC 1 <sup>52,53</sup>                                            | Small molecule              | Inactive | Drugs               | Novel      | Hypoxia-inducible factor 1 $\alpha$ (HIF-1 $\alpha$ ) | Pharmaceutical          | Early onset          | Treatment            | TRL 3.5 |
| 32 | HTHQ <sup>54</sup>                                               | Antioxidant                 | Active   | Drugs               | Novel      | Nrf-2                                                 | Academic                | Undefined            | Prevention/Treatment | TRL 3.5 |

|    |                                                  |                          |          |                     |            |                                             |                         |             |                      |         |
|----|--------------------------------------------------|--------------------------|----------|---------------------|------------|---------------------------------------------|-------------------------|-------------|----------------------|---------|
| 33 | AP39 <sup>55</sup>                               | Hydrogen sulphide donors | Active   | Drugs               | Novel      | Multiple (i.e. ERK1/2 and caspase-1)        | Pharmaceutical/Academic | Undefined   | Prevention/Treatment | TRL 3   |
| 34 | Cibinetide <sup>56</sup>                         | Amino acid-peptide       | Active   | Drugs               | Novel      | Erythropoietin receptors                    | Academic                | Undefined   | Treatment            | TRL 3.5 |
| 35 | Vitexin <sup>57</sup>                            | Polyphenol               | Active   | Dietary supplements | Novel      | TFPI-2 and HIF-1 $\alpha$ /VEGF expressions | Academic                | Undefined   | Symptom management   | TRL 3   |
| 36 | Toki-shakuyaku-san <sup>58,59</sup>              | Herbal                   | Active   | Drugs               | Repurposed | Unknown                                     | Pharmaceutical          | Undefined   | Symptom management   | TRL 3   |
| 37 | Grape seed extract <sup>60</sup>                 | Polyphenol               | Active   | Dietary supplements | Repurposed | Multiple (i.e. aromatase)                   | Academic                | Undefined   | Symptom management   | TRL 3   |
| 38 | SB203580 <sup>61,62</sup>                        | Small molecule           | Active   | Drugs               | Novel      | p38 MAPK                                    | Pharmaceutical/Academic | Undefined   | Treatment            | TRL 3.5 |
| 39 | Euterpe oleracea <sup>63,64</sup>                | Herbal                   | Active   | Dietary supplements | Repurposed | Unknown                                     | Academic                | Undefined   | Symptom management   | TRL 3   |
| 40 | Tempol <sup>65</sup>                             | Antioxidant              | Inactive | Drugs               | Novel      | Unknown                                     | Academic                | Undefined   | Treatment            | TRL 3   |
| 41 | VG 1177 <sup>66</sup>                            | Amino acid-peptide       | Inactive | Biologics           | Novel      | Class II-associated invariant chain peptide | Pharmaceutical/Academic | Undefined   | Prevention/Treatment | TRL 3.5 |
| 42 | Boiogito <sup>67</sup>                           | Herbal                   | Inactive | Dietary supplements | Unknown    | Non-specific                                | Pharmaceutical          | Undefined   | Treatment            | TRL 3   |
| 43 | Gelsolin <sup>68</sup>                           | Amino acid-peptide       | Inactive | Biologics           | Novel      | Cytoplasmic actin                           | Pharmaceutical/Academic | Undefined   | Prevention/Treatment | TRL 3   |
| 44 | Carveol <sup>69</sup>                            | Vascular agents          | Active   | Drugs               | Novel      | L-type Ca <sup>2+</sup> ion channels        | Academic                | Undefined   | Treatment            | TRL 3   |
| 45 | Saireito <sup>67</sup>                           | Herbal                   | Inactive | Drugs               | Repurposed | Unknown                                     | Pharmaceutical          | Undefined   | Treatment            | TRL 3   |
| 46 | Pirmagrel <sup>70</sup>                          | Vascular agents          | Inactive | Drugs               | Novel      | Thromboxane synthase                        | Academic                | Undefined   | Treatment            | TRL 3   |
| 47 | Sofalcone <sup>71</sup>                          | Small molecule           | Inactive | Drugs               | Repurposed | Heme oxygenase-1                            | Academic                | Undefined   | Treatment            | TRL 3   |
| 48 | Thymus schimperi <sup>72,73</sup>                | Herbal                   | Active   | Dietary supplements | Novel      | Unknown                                     | Academic                | Undefined   | Symptom management   | TRL 3   |
| 49 | Vitis labrusca/vinifera extract <sup>74-76</sup> | Polyphenol               | Active   | Dietary supplements | Repurposed | NO synthase                                 | Academic                | Undefined   | Symptom management   | TRL 3   |
| 50 | Regulatory T cells <sup>77</sup>                 | Cell therapy             | Inactive | Biologics           | Novel      | Multiple (i.e. normal pregnant Tregs)       | Academic                | Undefined   | Symptom management   | TRL 3   |
| 51 | BMS582949 <sup>61</sup>                          | Small molecule           | Inactive | Drugs               | Novel      | p38 MAPK                                    | Pharmaceutical/Academic | Early onset | Treatment            | TRL 3   |

|           |                           |                  |          |           |       |          |                         |             |            |       |
|-----------|---------------------------|------------------|----------|-----------|-------|----------|-------------------------|-------------|------------|-------|
| <b>52</b> | Doramapimod <sup>61</sup> | Small molecule   | Inactive | Drugs     | Novel | p38 MAPK | Pharmaceutical/Academic | Early onset | Treatment  | TRL 3 |
| <b>53</b> | Ad-VEGF <sup>78,79</sup>  | DNA, siRNA, mRNA | Inactive | Biologics | Novel | VEGFR-1  | Academic                | Undefined   | Prevention | TRL 3 |



## **Supplementary Data 2. Medium and low potential candidates.**

### **Medium potential candidates**

Of the 53 candidates analysed, 37 were identified as medium potential having a final score between 41 and 54 (Supplementary Table 3). These candidates tend to score lower in product development due to insufficient safety and efficacy studies (Supplementary Data 1). These candidates tend to also score lower in implementability due to route of administration and cold chain requirements (Supplementary Data 1). Five (13.5%) of these candidates are being investigated by pharmaceutical companies and 27 (73.0%) by academic institutes, while the remaining five (13.5%) are being explored by both (Supplementary Table 3). Three (8.1%) medium potential candidates are being investigated for pre-eclampsia prevention, 18 (48.6%) candidates are being explored for treatment, and seven (18.9%) candidates are for symptom management (Supplementary Data 1). The remaining nine (24.3%) candidates are being investigated for both the prevention and treatment of pre-eclampsia (Supplementary Table 3). The majority of medium potential candidates are at a TRL 3.5 meaning they need further research into the efficacy of the candidates (Supplementary Table 3).

### ***Medium potential candidates at a TRL 4***

Three medium potential candidates performed well enough in efficacy and mechanism of action preclinical studies to warrant being at a TRL 4 (GY4137, sFlt-1-targeting small interfering RNA (siRNA) and tetramethylpyrazine; Supplementary Table 3). GY4137 is a novel slow releasing H<sub>2</sub>S-releasing drug that has the ability to release H<sub>2</sub>S in a slow and sustained manner more similar to endogenous production of H<sub>2</sub>S.<sup>90</sup> This drug candidate is being investigated by Aston University and Sao Paulo State University for the treatment of pre-eclampsia targeting HO-1 and has produced two preclinical studies (Supplementary Data 1).<sup>90,91</sup> GY4137 can deliver H<sub>2</sub>S without potential toxicity, unlike fast-release sodium H<sub>2</sub>S which delivers H<sub>2</sub>S as a single concentrated burst.<sup>90</sup> GY4137 was more advantageous to restore systolic blood pressure and protect against uteroplacental fetal growth restriction and oxidative stress.<sup>90</sup>

Another medium potential candidate at a TRL 4 is sFlt-1-targeting siRNA which utilises placenta-specific nanoparticle delivery.<sup>60</sup> This candidate is being investigated by Chinese academic institutes for the treatment of pre-eclampsia and has scored high in efficacy and mechanism of action studies resulting in a TRL 4 score (Supplementary Table 3). Two preclinical studies have been performed for this candidate, both *in vitro* and *in vivo*, finding significantly decreased sFlt-1 levels and improved pre-eclampsia outcomes without a toxic effect when administered with this siRNA.<sup>92,93</sup>

Tetramethylpyrazine is at TRL 4. It is a traditional Chinese medicine that has been used extensively for cardiovascular and cerebrovascular diseases.<sup>60</sup> This repurposed drug candidate is being investigated by academic institutes in China for the treatment of pre-eclampsia targeting CHOP and GRP78 miRNAs (Supplementary Table 3). Two preclinical studies have been performed on these candidates both in *in vitro* and *in vivo* pre-eclamptic models, finding the inhibition of CHOP and GRP78 miRNA resulted in downstream effects on increasing NO synthesis leading to improved placental and fetal weights.<sup>94,95</sup>

Despite being at a TRL 4, all three of these medium potential candidates scored low in implementability. GYY4137 and tetramethylpyrazine are both administered intravenously, and sFlt-1-targeting siRNA is administered subcutaneously or intramuscularly. All three candidates require cold chain to be transported and stored stably (Supplementary Data 1).

The remaining 30 medium potential candidates scored less than a TRL 4, due to lower scores in preclinical efficacy studies. Although some of these candidates may have scored higher than those at TRL 4, either the mechanism of action or efficacy of the candidate was not explored sufficiently, which has prevented them from progressing to a higher TRL. These candidates are therefore either at a TRL 3 or TRL 3.5.

## **Low potential candidates**

Of the 53 candidates analysed, eight were identified as low potential having a final score of 40 or below (Supplementary Data 1). These candidates tend to score lower in quality of evidence and product development. Six (75.0%) of these candidates are being investigated by academic institutes and the two remaining (25.0%) are being explored by both (Supplementary Data 1). One (11.1%) candidate is being investigated for pre-eclampsia prevention, four (44.4%) are being explored for treatment, and four (44.4 %) candidates are for symptom management (Supplementary Table 3). Of the eight low potential candidates, two (22.2%) used a dosage in preclinical studies that was up to 25 times higher than the safe human dosage (Supplementary Data 1). All of the low potential candidates are at a TRL 3 meaning they need further research into the efficacy and mechanism of action of the candidates (Supplementary Table 3).

## References:

- 1 Saif, J. *et al.* Hydrogen sulfide releasing molecule MZe786 inhibits soluble Flt-1 and prevents preeclampsia in a refined RUPP mouse model. *Redox Biol* **38**, 101814 (2021). <https://doi.org/10.1016/j.redox.2020.101814>
- 2 Rezai, H. *et al.* MZe786, a hydrogen sulfide-releasing aspirin prevents preeclampsia in heme oxygenase-1 haplodeficient pregnancy under high soluble flt-1 environment. *Redox Biol* **38**, 101768 (2021). <https://doi.org/10.1016/j.redox.2020.101768>
- 3 Hastie, R. *et al.* EGFR (Epidermal Growth Factor Receptor) Signaling and the Mitochondria Regulate sFlt-1 (Soluble FMS-Like Tyrosine Kinase-1) Secretion. *Hypertension* **73**, 659-670 (2019). <https://doi.org/10.1161/hypertensionaha.118.12300>
- 4 Huang, Q. *et al.* Cyclosporin A ameliorates eclampsia seizure through reducing systemic inflammation in an eclampsia-like rat model. *Hypertension Research* **43**, 263-270 (2020). <https://doi.org/10.1038/s41440-019-0387-3>
- 5 Eddy, A. C. *et al.* Biopolymer-Delivered, Maternally Sequestered NF-κB (Nuclear Factor-κB) Inhibitory Peptide for Treatment of Preeclampsia. *Hypertension* **75**, 193-201 (2020). <https://doi.org/10.1161/hypertensionaha.119.13368>
- 6 Yang, H. *et al.* Mangiferin alleviates hypertension induced by hyperuricemia via increasing nitric oxide releases. *J Pharmacol Sci* **137**, 154-161 (2018). <https://doi.org/10.1016/j.jphs.2018.05.008>
- 7 Huang, J. *et al.* Mangiferin ameliorates placental oxidative stress and activates PI3K/Akt/mTOR pathway in mouse model of preeclampsia. *Arch Pharm Res* **43**, 233-241 (2020). <https://doi.org/10.1007/s12272-020-01220-7>
- 8 Spradley, F. T. *et al.* Placental Growth Factor Administration Abolishes Placental Ischemia-Induced Hypertension. *Hypertension* **67**, 740-747 (2016). <https://doi.org/10.1161/hypertensionaha.115.06783>
- 9 Makris, A. *et al.* Placental Growth Factor Reduces Blood Pressure in a Uteroplacental Ischemia Model of Preeclampsia in Nonhuman Primates. *Hypertension* **67**, 1263-1272 (2016). <https://doi.org/10.1161/hypertensionaha.116.07286>
- 10 Lecarpentier, E. *et al.* Total Versus Free Placental Growth Factor Levels in the Pathogenesis of Preeclampsia. *Hypertension* **76**, 875-883 (2020). <https://doi.org/10.1161/hypertensionaha.120.15338>
- 11 Williamson, R. D. *et al.* L-(+)-Ergothioneine Significantly Improves the Clinical Characteristics of Preeclampsia in the Reduced Uterine Perfusion Pressure Rat Model. *Hypertension* **75**, 561-568 (2020). <https://doi.org/10.1161/hypertensionaha.119.13929>

- 12 Tinsley, J. H., Chiasson, V. L., South, S., Mahajan, A. & Mitchell, B. M. Immunosuppression improves blood pressure and endothelial function in a rat model of pregnancy-induced hypertension. *Am J Hypertens* **22**, 1107-1114 (2009). <https://doi.org/10.1038/ajh.2009.125>
- 13 Holwerda, K. M. *et al.* Hydrogen sulfide attenuates sFlt1-induced hypertension and renal damage by upregulating vascular endothelial growth factor. *J Am Soc Nephrol* **25**, 717-725 (2014). <https://doi.org/10.1681/asn.2013030291>
- 14 Possomato-Vieira, J. S., Gonçalves-Rizzi, V. H., Graça, T. U., Nascimento, R. A. & Dias-Junior, C. A. Sodium hydrosulfide prevents hypertension and increases in vascular endothelial growth factor and soluble fms-like tyrosine kinase-1 in hypertensive pregnant rats. *Naunyn Schmiedebergs Arch Pharmacol* **389**, 1325-1332 (2016). <https://doi.org/10.1007/s00210-016-1296-5>
- 15 Zochio, G. P., Possomato-Vieira, J. S., Chimini, J. S., da Silva, M. L. S. & Dias-Junior, C. A. Effects of fast versus slow-releasing hydrogen sulfide donors in hypertension in pregnancy and fetoplacental growth restriction. *Naunyn Schmiedebergs Arch Pharmacol* **392**, 1561-1568 (2019). <https://doi.org/10.1007/s00210-019-01697-0>
- 16 LaMarca, B. *et al.* Hypertension in response to chronic reductions in uterine perfusion in pregnant rats: effect of tumor necrosis factor-alpha blockade. *Hypertension* **52**, 1161-1167 (2008). <https://doi.org/10.1161/hypertensionaha.108.120881>
- 17 Cunningham, M. W. *et al.* Tumor necrosis factor alpha (TNF- $\alpha$ ) blockade improves natural killer cell (NK) activation, hypertension, and mitochondrial oxidative stress in a preclinical rat model of preeclampsia. *Hypertens Pregnancy* **39**, 399-404 (2020). <https://doi.org/10.1080/10641955.2020.1793999>
- 18 Ebegboni, V. J., Balahmar, R. M., Dickenson, J. M. & Sivasubramaniam, S. D. The effects of flavonoids on human first trimester trophoblast spheroidal stem cell self-renewal, invasion and JNK/p38 MAPK activation: Understanding the cytoprotective effects of these phytonutrients against oxidative stress. *Biochem Pharmacol* **164**, 289-298 (2019). <https://doi.org/10.1016/j.bcp.2019.04.023>
- 19 Yang, S., Song, L., Shi, X., Zhao, N. & Ma, Y. Ameliorative effects of pre-eclampsia by quercetin supplement to aspirin in a rat model induced by L-NAME. *Biomed Pharmacother* **116**, 108969 (2019). <https://doi.org/10.1016/j.biopha.2019.108969>
- 20 Li, Q. *et al.* The bioflavonoid quercetin improves pathophysiology in a rat model of preeclampsia. *Biomed Pharmacother* **127**, 110122 (2020). <https://doi.org/10.1016/j.biopha.2020.110122>
- 21 Rana, S. *et al.* Ouabain inhibits placental sFlt1 production by repressing HSP27-dependent HIF-1 $\alpha$  pathway. *Faseb j* **28**, 4324-4334 (2014). <https://doi.org/10.1096/fj.14-252684>

- 22 Gong, W., Wan, J., Yuan, Q., Man, Q. & Zhang, X. Ferulic acid alleviates symptoms of preeclampsia in rats by upregulating vascular endothelial growth factor. *Clin Exp Pharmacol Physiol* **44**, 1026-1031 (2017). <https://doi.org/10.1111/1440-1681.12801>
- 23 Chen, Y. *et al.* Ferulic acid ameliorated placental inflammation and apoptosis in rat with preeclampsia. *Clin Exp Hypertens* **41**, 524-530 (2019). <https://doi.org/10.1080/10641963.2018.1516773>
- 24 Xiao, S., Zhang, M., He, Z. & Wang, D. Celastrol attenuates symptoms of preeclampsia in rats by inhibiting matrix metalloproteinase-9. *Eur J Pharmacol* **830**, 33-38 (2018). <https://doi.org/10.1016/j.ejphar.2018.04.025>
- 25 Chatterjee, P. *et al.* Human placenta-derived stromal cells decrease inflammation, placental injury and blood pressure in hypertensive pregnant mice. *Clin Sci (Lond)* **130**, 513-523 (2016). <https://doi.org/10.1042/cs20150555>
- 26 Agnes Batmomolin, A. A., I. Wayan Arsana Wiyasa, Sanarto Santoso. *Ethanol extract of Moringa oleifera leaves improve inflammation, angiogenesis, and blood pressure in rat model of preeclampsia*. Vol. Volume: 10 (Issue: 8, 2020).
- 27 Wang, K. *et al.* Dysregulation of hydrogen sulfide producing enzyme cystathionine  $\gamma$ -lyase contributes to maternal hypertension and placental abnormalities in preeclampsia. *Circulation* **127**, 2514-2522 (2013). <https://doi.org/10.1161/circulationaha.113.001631>
- 28 Gairard, A. *et al.* Effect of i1 imidazoline receptor agonist, moxonidine, in nitric oxide-deficient hypertension in pregnant rats. *J Cardiovasc Pharmacol* **43**, 731-736 (2004). <https://doi.org/10.1097/00005344-200405000-00017>
- 29 Kaga, M. *et al.* Liposome-encapsulated hemoglobin (hemoglobin-vesicle) is not transferred from mother to fetus at the late stage of pregnancy in the rat model. *Life Sci* **91**, 420-428 (2012). <https://doi.org/10.1016/j.lfs.2012.08.021>
- 30 Li, H. *et al.* Artificial oxygen carriers rescue placental hypoxia and improve fetal development in the rat pre-eclampsia model. *Sci Rep* **5**, 15271 (2015). <https://doi.org/10.1038/srep15271>
- 31 Ohta, H. *et al.* Potential New Non-Invasive Therapy Using Artificial Oxygen Carriers for Pre-Eclampsia. *J Funct Biomater* **8** (2017). <https://doi.org/10.3390/jfb8030032>
- 32 Charlton, F. *et al.* The protective effect of apolipoprotein in models of trophoblast invasion and preeclampsia. *Am J Physiol Regul Integr Comp Physiol* **312**, R40-r48 (2017). <https://doi.org/10.1152/ajpregu.00331.2016>
- 33 Liao, S., Wu, H. & Chen, R. Apolipoprotein A1 mimetic peptide ATI-5261 reverses arterial stiffness at late pregnancy and early postpartum in a COMT(-/-) mouse model

- of preeclampsia. *Clin Hypertens* **24**, 11 (2018). <https://doi.org/10.1186/s40885-018-0097-1>
- 34 Gu, S. *et al.* Tetramethylpyrazine reduces the consequences of nitric oxide inhibition in pregnant rats. *J Cell Physiol* **234**, 19799-19806 (2019). <https://doi.org/10.1002/jcp.28579>
- 35 Yuan, Y., Zhao, L., Wang, X., Lian, F. & Cai, Y. Ligustrazine-induced microRNA-16-5p inhibition alleviates preeclampsia through IGF-2. *Reproduction* **160**, 905-917 (2020). <https://doi.org/10.1530/rep-20-0309>
- 36 Li, Z. *et al.* Recombinant vascular endothelial growth factor 121 attenuates hypertension and improves kidney damage in a rat model of preeclampsia. *Hypertension* **50**, 686-692 (2007). <https://doi.org/10.1161/hypertensionaha.107.092098>
- 37 Haase, N. *et al.* RNA interference therapeutics targeting angiotensinogen ameliorate preeclamptic phenotype in rodent models. *J Clin Invest* **130**, 2928-2942 (2020). <https://doi.org/10.1172/jci99417>
- 38 Younes, S. T., Maeda, K. J., Sasser, J. & Ryan, M. J. The glucagon-like peptide 1 receptor agonist liraglutide attenuates placental ischemia-induced hypertension. *Am J Physiol Heart Circ Physiol* **318**, H72-h77 (2020). <https://doi.org/10.1152/ajpheart.00486.2019>
- 39 Laufs, U., La Fata, V., Plutzky, J. & Liao, J. K. Upregulation of endothelial nitric oxide synthase by HMG CoA reductase inhibitors. *Circulation* **97**, 1129-1135 (1998). <https://doi.org/10.1161/01.cir.97.12.1129>
- 40 Putra, R. A., Effendi, J. S., Permadi, W., Bandiara, R. & Fauziah, P. N. Role of lovastatin on level of Soluble FMS-Like Tyrosinase-1 (sFlt-1), Placental Growth Factor (PLGF) in Preeclampsia-induced Human Umbilical Vein Endothelial Cell (HUVEC). *Bioscience Research* **15**, 967-974 (2018).
- 41 Wang, Y. *et al.* A potential role of Baicalin to inhibit apoptosis and protect against acute liver and kidney injury in rat preeclampsia model. *Biomed Pharmacother* **108**, 1546-1552 (2018). <https://doi.org/10.1016/j.biopha.2018.09.107>
- 42 Liu, Y., Xiong, M., Zhou, F., Shi, N. & Jia, Y. Effect of baicalin on gestational hypertension-induced vascular endothelial cell damage. *J Int Med Res* **48**, 300060520934288 (2020). <https://doi.org/10.1177/0300060520934288>
- 43 Yu, J., Jia, J., Guo, X., Chen, R. & Feng, L. Modulating circulating sFlt1 in an animal model of preeclampsia using PAMAM nanoparticles for siRNA delivery. *Placenta* **58**, 1-8 (2017). <https://doi.org/10.1016/j.placenta.2017.07.360>



- 44 Li, L. *et al.* Trophoblast-Targeted Nanomedicine Modulates Placental sFLT1 for Preeclampsia Treatment. *Front Bioeng Biotechnol* **8**, 64 (2020). <https://doi.org/10.3389/fbioe.2020.00064>
- 45 Quitterer, U. *et al.* Beta-Arrestin1 Prevents Preeclampsia by Downregulation of Mechanosensitive AT1-B2 Receptor Heteromers. *Cell* **176**, 318-333.e319 (2019). <https://doi.org/10.1016/j.cell.2018.10.050>
- 46 Violin, J. D. *et al.* Selectively engaging  $\beta$ -arrestins at the angiotensin II type 1 receptor reduces blood pressure and increases cardiac performance. *J Pharmacol Exp Ther* **335**, 572-579 (2010). <https://doi.org/10.1124/jpet.110.173005>
- 47 Li, Y. L. *et al.* Enhanced Protective Effect of the Combination of Uncaria and Semen Raphani on Vascular Endothelium in Spontaneously Hypertensive Rats. *Evid Based Complement Alternat Med* **2015**, 358352 (2015). <https://doi.org/10.1155/2015/358352>
- 48 Kim, J. H., Bae, C. H., Park, S. Y., Lee, S. J. & Kim, Y. Uncaria rhynchophylla inhibits the production of nitric oxide and interleukin-1 $\beta$  through blocking nuclear factor  $\kappa$ B, Akt, and mitogen-activated protein kinase activation in macrophages. *J Med Food* **13**, 1133-1140 (2010). <https://doi.org/10.1089/jmf.2010.1128>
- 49 Wu, L. Z. & Xiao, X. M. Evaluation of the effects of Uncaria rhynchophylla alkaloid extract on LPS-induced preeclampsia symptoms and inflammation in a pregnant rat model. *Braz J Med Biol Res* **52**, e8273 (2019). <https://doi.org/10.1590/1414-431x20198273>
- 50 Yang, X., Guo, L., Sun, X., Chen, X. & Tong, X. Protective effects of hydrogen-rich saline in preeclampsia rat model. *Placenta* **32**, 681-686 (2011). <https://doi.org/10.1016/j.placenta.2011.06.020>
- 51 Ushida, T. *et al.* Molecular hydrogen ameliorates several characteristics of preeclampsia in the Reduced Uterine Perfusion Pressure (RUPP) rat model. *Free Radic Biol Med* **101**, 524-533 (2016). <https://doi.org/10.1016/j.freeradbiomed.2016.10.491>
- 52 Turgut, N. H. *et al.* Investigation of the role of the NO-cGMP pathway on YC-1 and DEA/NO effects on thoracic aorta smooth muscle responses in a rat preeclampsia model. *Can J Physiol Pharmacol* **91**, 797-803 (2013). <https://doi.org/10.1139/cjpp-2013-0086>
- 53 Brownfoot, F. C. *et al.* YC-1 reduces placental sFlt-1 and soluble endoglin production and decreases endothelial dysfunction: A possible therapeutic for preeclampsia. *Mol Cell Endocrinol* **413**, 202-208 (2015). <https://doi.org/10.1016/j.mce.2015.06.033>
- 54 Jiang, L. *et al.* 1-O-Hexyl-2,3,5-Trimethylhydroquinone Ameliorates the Development of Preeclampsia through Suppression of Oxidative Stress and

Endothelial Cell Apoptosis. *Oxid Med Cell Longev* **2021**, 8839394 (2021).  
<https://doi.org/10.1155/2021/8839394>

- 55 Covarrubias, A. E. *et al.* AP39, a Modulator of Mitochondrial Bioenergetics, Reduces Antiangiogenic Response and Oxidative Stress in Hypoxia-Exposed Trophoblasts: Relevance for Preeclampsia Pathogenesis. *Am J Pathol* **189**, 104-114 (2019).  
<https://doi.org/10.1016/j.ajpath.2018.09.007>
- 56 Korokin, M. *et al.* Erythropoietin Mimetic Peptide (pHBSP) Corrects Endothelial Dysfunction in a Rat Model of Preeclampsia. *Int J Mol Sci* **21** (2020).  
<https://doi.org/10.3390/ijms21186759>
- 57 Zheng, L. *et al.* Vitexin ameliorates preeclampsia phenotypes by inhibiting TFPI-2 and HIF-1 $\alpha$ /VEGF in a l-NAME induced rat model. *Drug Dev Res* **80**, 1120-1127 (2019). <https://doi.org/10.1002/ddr.21596>
- 58 Takei, H. *et al.* The herbal medicine Toki-shakuyaku-san improves the hypertension and intrauterine growth retardation in preeclampsia rats induced by Nomega-nitro-L-arginine methyl ester. *Phytomedicine* **11**, 43-50 (2004). <https://doi.org/10.1078/0944-7113-00332>
- 59 Takei, H., Yamamoto, M., Kase, Y. & Takeda, S. The effect of herbal medicine Toki-shakuyaku-san on blood pressure in an Nomega-nitro-L-arginine methyl ester-induced pre-eclampsia rat model during pregnancy and the postpartum period. *J Pharmacol Sci* **98**, 255-262 (2005). <https://doi.org/10.1254/jphs.fpj04043x>
- 60 Tropea, T., Greenwood, S. L., Sibley, C. P. & Cottrell, E. C. Grape Seed Extract Polyphenols Improve Resistance Artery Function in Pregnant eNOS(-/-) Mice. *Front Physiol* **11**, 588000 (2020). <https://doi.org/10.3389/fphys.2020.588000>
- 61 Che, G. *et al.* Knockdown of Heparanase Suppresses Invasion of Human Trophoblasts by Activating p38 MAPK Signaling Pathway. *Dis Markers* **2018**, 7413027 (2018).  
<https://doi.org/10.1155/2018/7413027>
- 62 Fan, M. *et al.* LPS Induces Preeclampsia-Like Phenotype in Rats and HTR8/SVneo Cells Dysfunction Through TLR4/p38 MAPK Pathway. *Front Physiol* **10**, 1030 (2019). <https://doi.org/10.3389/fphys.2019.01030>
- 63 Rocha, A. P. *et al.* Endothelium-dependent vasodilator effect of Euterpe oleracea Mart. (Açaí) extracts in mesenteric vascular bed of the rat. *Vascul Pharmacol* **46**, 97-104 (2007). <https://doi.org/10.1016/j.vph.2006.08.411>
- 64 da Silva, A. S. *et al.* Açaí (Euterpe oleracea Mart) seed extract protects against maternal vascular dysfunction, hypertension, and fetal growth restriction in experimental preeclampsia. *Hypertens Pregnancy* **39**, 211-219 (2020).  
<https://doi.org/10.1080/10641955.2020.1754850>

- 65 Hoffmann, D. S. *et al.* Chronic tempol prevents hypertension, proteinuria, and poor fetoplacental outcomes in BPH/5 mouse model of preeclampsia. *Hypertension* **51**, 1058-1065 (2008). <https://doi.org/10.1161/hypertensionaha.107.107219>
- 66 Chatterjee, P. *et al.* Depletion of MHC class II invariant chain peptide or  $\gamma$ - $\delta$  T-cells ameliorates experimental preeclampsia. *Clin Sci (Lond)* **131**, 2047-2058 (2017). <https://doi.org/10.1042/cs20171008>
- 67 Takei, H. *et al.* The herbal medicines Saireito and Boiogito improve the hypertension of pre-eclamptic rats induced by Nomega-Nitro-L-arginine methyl ester. *Phytomedicine* **14**, 591-600 (2007). <https://doi.org/10.1016/j.phymed.2007.01.009>
- 68 Nadkarni, N. A. *et al.* Gelsolin is an endogenous inhibitor of syncytiotrophoblast extracellular vesicle shedding in pregnancy. *Pregnancy Hypertens* **6**, 333-339 (2016). <https://doi.org/10.1016/j.preghy.2016.07.003>
- 69 Evaristo Rodrigues da Silva, R. *et al.* Relaxant Effect of Monoterpene (-)-Carveol on Isolated Human Umbilical Cord Arteries and the Involvement of Ion Channels. *Molecules* **25** (2020). <https://doi.org/10.3390/molecules25112681>
- 70 Ding, Z. Q., Rowe, J., Ng, B., Sinosich, M. J. & Gallery, E. D. Modulation of prostacyclin and thromboxane secretion by cytotrophoblasts from normal and pre-eclamptic human pregnancies. *Placenta* **23**, 594-599 (2002). <https://doi.org/10.1053/plac.2002.0851>
- 71 Onda, K. *et al.* Sofalcone upregulates the nuclear factor (erythroid-derived 2)-like 2/heme oxygenase-1 pathway, reduces soluble fms-like tyrosine kinase-1, and quenches endothelial dysfunction: potential therapeutic for preeclampsia. *Hypertension* **65**, 855-862 (2015). <https://doi.org/10.1161/hypertensionaha.114.04781>
- 72 Haji, H., Makonnen, E., Debella, A. & Geleta, B. Evaluation of diuretic and antihypertensive activity of leaf extracts of *Thymus schimperi* in rats. *British Journal of Pharmacology and Toxicology* **7**, 1-8 (2016).
- 73 Mergiaaw, K. *et al.* Effects of Aqueous Leaf Extract of *Thymus schimperion* Hematologic Profiles of Animal Models of Pre-eclampsia. 30-36 (2020).
- 74 Soares De Moura, R. *et al.* Antihypertensive, vasodilator and antioxidant effects of a vinifera grape skin extract. *J Pharm Pharmacol* **54**, 1515-1520 (2002). <https://doi.org/10.1211/002235702153>
- 75 de Moura, R. S., Resende, A. C., Moura, A. S. & Maradei, M. F. Protective action of a hydroalcoholic extract of a vinifera grape skin on experimental preeclampsia in rats. *Hypertens Pregnancy* **26**, 89-100 (2007). <https://doi.org/10.1080/10641950601147960>
- 76 da Costa, G. F. *et al.* *Vitis vinifera* L. Grape Skin Extract Prevents Development of Hypertension and Altered Lipid Profile in Spontaneously Hypertensive Rats: Role of

Oxidative Stress. *Prev Nutr Food Sci* **25**, 25-31 (2020).

<https://doi.org/10.3746/pnf.2020.25.1.25>

- 77 Cornelius, D. C. *et al.* An increased population of regulatory T cells improves the pathophysiology of placental ischemia in a rat model of preeclampsia. *Am J Physiol Regul Integr Comp Physiol* **309**, R884-891 (2015).  
<https://doi.org/10.1152/ajpregu.00154.2015>
- 78 Miquerol, L., Langille, B. L. & Nagy, A. Embryonic development is disrupted by modest increases in vascular endothelial growth factor gene expression. *Development* **127**, 3941-3946 (2000). <https://doi.org/10.1242/dev.127.18.3941>
- 79 Woods, A. K. *et al.* Adenoviral delivery of VEGF121 early in pregnancy prevents spontaneous development of preeclampsia in BPH/5 mice. *Hypertension* **57**, 94-102 (2011). <https://doi.org/10.1161/hypertensionaha.110.160242>
